# Supplementary material for: A Transcriptome-Wide Association Study Among 97,898 Women to Identify Candidate Susceptibility Genes for Epithelial Ovarian Cancer Risk
Source: Oxford University Press journal article supplement (doi:10.1158/0008-5472.can-18-0951), 2018-07-27
Supplement: 00085472can180951-sup-199337_3_supp_4846218_pcqcfd.xlsx [file 00085472can180951-sup-199337_3_supp_4846218_pcqcfd.xlsx]

## Sheet: Sheet1
Supplementary Table S3. Known common variants identified from genome-wide assocation studies and their bioinformatically predicted target genes.a
Locus#	Locus	SNP	Position (hg37)	Histotype	Nearby geneb	Highlighted target gene	Method used to assess potential causal genes	Reference	TWAS identified gene
1	1p36.12	rs56318008	22470407	Serous : invasive	WNT4	WNT4, CDC42, LINC00339, RAP1GAP	literature, differential gene expression between cancer tissue and normal tissue	Kuchenbaecker 2015
2	1p34.3	rs58722170	38096421	Serous : invasive	RSPO1	RSPO1, C1orf109, FHL3	literature	Kuchenbaecker 2015	DNALI1
3	2q13	rs2165109	111818658	Serous : high-grade + BRCA1/2c	ACOXL	BUB1, BCL2L11	Functional annotation, cis-Eqtl, methylation, literature	Phelan 2017
	2q13	rs17041869	111896243	Serous	BCL2L11	BCL2L11	Enhancer enrichement, cis-Eqtl, pathway analysis,literature,	Kar 2016
4	2q13	rs752590	113972945	Mucinous	PAX8	PAX8	cis-Eqtl, functional element annotation	Kelemen 2015
5	2q31.1	rs2072590	177042633	Serous : invasive	HOXD-AS1	HOXD3, HOXD1	literature, differential gene expression between cancer tissue and normal tissue	Goode 2010	HOXD3, HOXD1
	2q31.1	rs711830	177037311	Mucinous	HOXD3	HOXD9	cis-Eqtl, chromosome conformation capture, in vitro over expression, functional element annotation	Kelemen 2015
6	3q23	rs112071820	138849110	Mucinous : invasive + borderl i ne	MRPS22	FOXL2, RBP1	Functional annotation, cis-Eqtl, methylation, literature	Phelan 2017
7	3q25.31	rs2665390	156397749	Serous : invasive	TIPARP	TIPARP	literature, differential gene expression between cancer tissue and normal tissue, in vitro model	Goode 2010	LEKR1
	3q25.31	rs7651446	156406997	Serous : invasive	TIPARP	-	-	Pharoah 2013
	3q25.31	rs62273959	156570680	Serous : invasive	LEKR1	LEKR1	coding variant	Permuth 2016
8	3q28	rs9870207	190525516	Serous : low-grade + borderl i ne	RP11-332P22.2	GMNC	Functional annotation, cis-Eqtl, methylation, literature	Phelan 2017
9	4q26	rs17329882	119949960	Serous : invasive	SYNPO2	SYNPO2	literature, differential gene expression between cancer tissue and normal tissue	Kuchenbaecker 2015
10	4q32.3	rs4691139	165908721	BRCA1c	TRIM61	TRIM60, c4orf39, TMEM192	Expressed in ovarian epithelium and/or ovarian tumors	Couch 2013
11	4q32.3	rs13113999	167187046	Serous : borderl i ne	AC093874.1	-	Functional annotation, cis-Eqtl, methylation, literature	Phelan 2017
12	5p15.33	rs10069690	1279790	Serous : invasive	TERT	TERT	Promoter activity, alternative splicing of TERT, open chromatin analysis, methylation, association with telomere lenghth	Bojesen 2013
	5p15.33	rs2242652	1280028	Serous : invasive	TERT	TERT	Promoter activity, alternative splicing of TERT, open chromatin analysis, methylation, association with telomere lenghth	Bojesen 2013
	5p15.33	rs7705526	1285974	Serous: borderline	TERT	TERT	Promoter activity, alternative splicing of TERT, open chromatin analysis, methylation, association with telomere lenghth	Bojesen 2013
13	5q12.3	rs555025179	66121089	Endometrioid	MAST4	-	Functional annotation, cis-Eqtl, methylation, literature	Phelan 2017
14	6p22.1	rs116133110 (rs6456822)	28480635	Serous : invasive	GPX6	ZKSCAN3, TRIM27	literature	Kuchenbaecker 2015
15	8q21.11	rs150293538	77320354	Serous : low-grade + borderl i ne	LINC01111, LINC01109	-	Functional annotation, cis-Eqtl, methylation, literature	Phelan 2017
16	8q21.13	rs11782652	82653644	Serous : invasive	CHMP4C	CHMP4C	cis-Eqtl, methylation, literature	Pharoah 2013	CHMP4C
17	8q24.21	rs9886651	128817883	Serous : high-grade + BRCA1/2c	PVT1	PVT1, MYC	Functional annotation, cis-Eqtl, methylation, literature	Phelan 2017
	8q24.21	rs10088218	129543949	Serous : invasive	RP11-89M16.1	MYC	literature	Goode 2010
18	9p22.2	rs3814113	16915021	Serous : invasive	BNC2	BNC2	literature, differential gene expression between cancer tissue and normal tissue, in vitro model	Song 2009, Permuth 2016, Goode 2010	CCDC171, C9orf92
19	9q31.1	rs320203	104943226	Mucinous : invasive + borderl i ne	RNU6-329P	-	Functional annotation, cis-Eqtl, methylation, literature	Phelan 2017
20	9q31.1	rs200182588	106856690	Serous : invasive	SMC2	SMC2	cis-Eqtl, literature	Kar 2016
21	9q34.2	rs635634	136155000	Serous : invasive	ABO	ABO, TSC1, RALGDS,RPL7A, VAV2	literature, differential gene expression between cancer tissue and normal tissue	Kuchenbaecker 2015	ABO
22	10p12.31	rs1243180	21915619	Serous : invasive	MLLT10	NEBL, C10orf114, SKIDA1, MLLT10	cis-Eqtl, methylation, differential gene expression between cancer tissue and normal tissue, CNV, literature	Pharoah 2013
23	10q24.33	rs7902587	105694301	Serous : low-grade + borderl i ne	OBFC1	OBFC1	Functional annotation, cis-Eqtl, methylation, literature	Phelan 2017	OBFC1
24	11q12.3	rs7937840	61893972	Serous : invasive	INCENP	INCENP, MTA2	literature	Kar 2016
25	12q24.31	rs7953249	121403724	Serous : high-grade + BRCA1/2c	HNF1A-AS1	HNF1A, ORAI1	Functional annotation, cis-Eqtl, methylation, literature	Phelan 2017
26	15q26.1	rs8037137	91506637	Serous : invasive	RCCD1	RCCD1	cis-Eqtl	Kar 2016	RCCD1
27	17q11.2	rs199661266 (chr17:29181220:I)	29181221	Serous : invasive	ATAD5	NF1, ATAD5	literature	Kuchenbaecker 2015
28	17q12	rs7405776	36093022	Serous : invasive	HNF1B	HNF1B	methylation, protein expression	Shen 2013
	17q12	rs757210	36096515	Serous : invasive	HNF1B	HNF1B	methylation, differential gene expression between cancer tissue and normal tissue, literature	Pharoah 2013
	17q12	rs11651755	36099840	Clear cell	HNF1B	HNF1B	methylation, protein expression, in vitro model	Shen 2013
29	17q21.31	rs2960000	43499839	Serous : invasive	ARHGAP27	ARHGAP27, PLEKHM1	cis-Eqtl, differential gene expression between cancer tissue and normal tissue, CNV, methylation	Permuth-Wey 2013	ADAM11, AC091132.1, PLEKHM1, RP11-798G7.8, CRHR1, RP11-105N13.4, MAPT-AS1, KANSL1, RP11-669E14.6, KANSL1-AS1, LRRC37A, LRRC37A2, NSF, WNT3
	17q21.31	rs17631303	43516402	BRCA1c	PLEKHM1	PLEKHM1, c17orf69, ARHGAP27, MAPT, KANSL1, WNT3	cis-Eqtl	Couch 2013
30	17q21.32	rs9303542	46411500	Serous : invasive	SKAP1	SKAP1	literature, differential gene expression between cancer tissue and normal tissue, in vitro model	Pharoah 2013, Goode 2010	RP11-138C9.1, RP11-6N17.6, PNPO, PRR15L, HOXB2, HOXB-AS1, HOXB3
31	18q11.2	rs8098244	21405553	Serous : LG + borderl i ne	LAMA3	LAMA3, TTC39C	Functional annotation, cis-Eqtl, methylation, literature	Phelan 2017	RP11-403A21.1
32	19p13.11	rs8170	17389704	Serous : invasive	BABAM1	C19orf62 (MERIT40), ANKLE1, ABHD8	literature, CNV, cis-Eqtl, Chromosome conformation capture, functional annotation, functional analysis of promoter and enhancer SNPs, in vitro overexpression	Bolton 2011, Lawrenson 2016	ABHD8
	19p13.11	rs2363956	17394124	Serous : invasive	ANKLE1	C19orf62 (MERIT40), ANKLE1, ABHD8	literature, CNV, cis-Eqtl, Chromosome conformation capture, functional annotation, functional analysis of promoter and enhancer SNPs, in vitro overexpression	Bolton 2011, Lawrenson 2016
33	19p13.11	rs1469713	19528806	Serous : invasive	GATAD2A	GATAD2A	cis-Eqtl, Enhancer enrichement, literature	Kar 2016
34	19q13.2	rs688187	39732752	Mucinous	IFNL3	IFNL3	coding variant annotation	Kelemen 2015	ZNF546
35	22q12.1	rs6005807	28934313	Serous : invasive	TTC28	TTC28, CHEK2, XPB1	Functional annotation, cis-Eqtl, methylation, literature	Phelan 2017
a Rows highlighted in grey indicate that nearby genes were assocated with ovarian cancer risk in current transcriptome-wide association analysis.
b GENCODE V19
c BRCA mutation carriers
