# Supplementary material for: A Transcriptome-Wide Association Study Among 97,898 Women to Identify Candidate Susceptibility Genes for Epithelial Ovarian Cancer Risk
Source: Oxford University Press journal article supplement (doi:10.1158/0008-5472.can-18-0951), 2018-07-27
Supplement: 00085472can180951-sup-199337_3_supp_4846220_pkqkfd.xlsx [file 00085472can180951-sup-199337_3_supp_4846220_pkqkfd.xlsx]

## Sheet: Sheet1
Supplementary Table S5. Genes coregulated in predicted expression at 2q31.1, 9p22.3, 17q21.31 and 17q21.32.a, b
2q31.1
Ovarian			HOXD1
	HOXD3	Rho	0.09545
		P	0.4388
Cross-tissue			HOXD1
	HOXD3	Rho	0.53456
		P	<.0001
9p22.3
Ovarian			C9orf92
	CCDC171	Rho	0.04259
		P	0.7302
17q21.31
Ovarian			AC091132.1	PLEKHM1	RP11-798G7.8	CRHR1	RP11-105N13.4	KANSL1	RP11-669E14.6	KANSL1-AS1	LRRC37A	LRRC37A2	NSF	WNT3
	ADAM11	Rho	-0.01333	-0.01635	-0.46493	-0.44876	-0.59501	-0.32048	0.0819	-0.45081	-0.48613	-0.52342	0.4001	0.04151
		P	0.9141	0.8947	<.0001	0.0001	<.0001	0.0077	0.5067	0.0001	<.0001	<.0001	0.0007	0.7368
	AC091132.1	Rho		0.08717	-0.21277	-0.2089	-0.02843	-0.30798	0.01915	-0.24466	-0.20292	-0.20014	0.29309	0.05091
		P		0.4797	0.0815	0.0873	0.818	0.0106	0.8768	0.0443	0.097	0.1018	0.0153	0.6801
	PLEKHM1	Rho			-0.11036	-0.09519	0.03129	-0.05671	0.14096	-0.06515	-0.08797	-0.07451	0.07301	-0.05881
		P			0.3703	0.44	0.8	0.646	0.2516	0.5976	0.4756	0.5459	0.554	0.6338
	RP11-798G7.8	Rho				0.77648	0.45179	0.5264	0.04179	0.86396	0.8161	0.81217	-0.49744	0.05427
		P				<.0001	0.0001	<.0001	0.7351	<.0001	<.0001	<.0001	<.0001	0.6603
	CRHR1	Rho					0.58557	0.40713	0.04766	0.84681	0.89685	0.85975	-0.53783	-0.10671
		P					<.0001	0.0006	0.6996	<.0001	<.0001	<.0001	<.0001	0.3864
	RP11-105N13.4	Rho						0.14587	-0.08156	0.52913	0.63963	0.6279	-0.14622	-0.07963
		P						0.2352	0.5085	<.0001	<.0001	<.0001	0.2341	0.5186
	KANSL1	Rho							-0.11354	0.59478	0.41198	0.51096	-0.35784	0.00053
		P							0.3566	<.0001	0.0005	<.0001	0.0027	0.9966
	RP11-669E14.6	Rho								-0.00455	0.00712	-0.04757	-0.18365	0.08378
		P								0.9706	0.9541	0.7001	0.1338	0.497
	KANSL1-AS1	Rho									0.93243	0.93872	-0.5447	0.00575
		P									<.0001	<.0001	<.0001	0.9629
	LRRC37A	Rho										0.9589	-0.46136	0.0087
		P										<.0001	<.0001	0.9438
	LRRC37A2	Rho											-0.45434	0.01007
		P											<.0001	0.9351
	NSF	Rho												0.18025
		P												0.1413
Cross-tissue			AC091132.1	PLEKHM1	CRHR1	RP11-105N13.4	MAPT-AS1	KANSL1	RP11-669E14.6	KANSL1-AS1	LRRC37A	LRRC37A2	NSF	WNT3
	ADAM11	Rho	0.09957	-0.13285	0.0481	0.07813	0.06945	-0.01243	-0.05998	0.08603	0.03805	0.06017	-0.03408	0.09882
		P	0.056	0.0106	0.3568	0.1341	0.1831	0.8119	0.2504	0.0989	0.4662	0.2489	0.514	0.0579
	AC091132.1	Rho		-0.2585	-0.63081	-0.54196	-0.62593	0.10342	0.64478	-0.58454	-0.48818	-0.60641	0.11749	-0.51985
		P		<.0001	<.0001	<.0001	<.0001	0.0471	<.0001	<.0001	<.0001	<.0001	0.024	<.0001
	PLEKHM1	Rho			0.39513	0.27522	0.37955	0.05099	-0.39082	0.37108	0.22695	0.33979	-0.18643	0.2994
		P			<.0001	<.0001	<.0001	0.3286	<.0001	<.0001	<.0001	<.0001	0.0003	<.0001
	CRHR1	Rho				0.76705	0.96573	-0.02059	-0.98802	0.95032	0.80555	0.94955	-0.23508	0.79931
		P				<.0001	<.0001	0.6934	<.0001	<.0001	<.0001	<.0001	<.0001	<.0001
	RP11-105N13.4	Rho					0.75209	-0.01719	-0.75562	0.74834	0.63202	0.75296	-0.17649	0.64995
		P					<.0001	0.742	<.0001	<.0001	<.0001	<.0001	0.0007	<.0001
	MAPT-AS1	Rho						-0.02636	-0.96553	0.94384	0.78391	0.93416	-0.2304	0.79831
		P						0.6137	<.0001	<.0001	<.0001	<.0001	<.0001	<.0001
	KANSL1	Rho							0.01781	0.20894	-0.17648	-0.02318	-0.69766	-0.25553
		P							0.7331	<.0001	0.0007	0.6571	<.0001	<.0001
	RP11-669E14.6	Rho								-0.95044	-0.80362	-0.95055	0.23733	-0.79336
		P								<.0001	<.0001	<.0001	<.0001	<.0001
	KANSL1-AS1	Rho									0.74969	0.92634	-0.40064	0.75036
		P									<.0001	<.0001	<.0001	<.0001
	LRRC37A	Rho										0.91637	0.16179	0.74598
		P										<.0001	0.0018	<.0001
	LRRC37A2	Rho											-0.13839	0.81842
		P											0.0078	<.0001
	NSF	Rho												-0.03292
		P												0.5285
17q21.32
Ovarian			RP11-6N17.6	PNPO	PRR15L	HOXB2	HOXB-AS1	HOXB3
	RP11-138C9.1	Rho	-0.01203	0.20007	0.00647	-0.09214	0.11955	-0.14106
		P	0.9224	0.1019	0.9583	0.4549	0.3315	0.2512
	RP11-6N17.6	Rho		0.16922	0.01918	-0.13772	-0.12876	-0.15401
		P		0.1677	0.8766	0.2627	0.2954	0.2099
	PNPO	Rho			0.06162	0.02012	0.08891	0.05733
		P			0.6177	0.8706	0.4709	0.6424
	PRR15L	Rho				-0.04913	-0.08719	-0.02725
		P				0.6907	0.4796	0.8254
	HOXB2	Rho					0.3128	0.13988
		P					0.0094	0.2553
	HOXB-AS1	Rho						-0.01997
		P						0.8716
Cross-tissue			RP11-6N17.6	PNPO	PRR15L	HOXB2	HOXB-AS1	HOXB3
	RP11-138C9.1	Rho	0.40135	0.4199	-0.22602	-0.55983	-0.54908	-0.50235
		P	<.0001	<.0001	<.0001	<.0001	<.0001	<.0001
	RP11-6N17.6	Rho		0.91184	-0.5565	-0.46499	-0.45087	-0.51377
		P		<.0001	<.0001	<.0001	<.0001	<.0001
	PNPO	Rho			-0.38304	-0.41512	-0.4128	-0.46021
		P			<.0001	<.0001	<.0001	<.0001
	PRR15L	Rho				0.34652	0.32974	0.4446
		P				<.0001	<.0001	<.0001
	HOXB2	Rho					0.96829	0.91196
		P					<.0001	<.0001
	HOXB-AS1	Rho						0.89728
								<.0001
a The analysis was based on the predicted expression data from Genotype-Tissue Expression Project (See Online Supplementary Material for details).
b The genes highly correlated in expression were highlighed in bold (based on Pearson correlation).
