# Supplementary material for: A Transcriptome-Wide Association Study Among 97,898 Women to Identify Candidate Susceptibility Genes for Epithelial Ovarian Cancer Risk
Source: Oxford University Press journal article supplement (doi:10.1158/0008-5472.can-18-0951), 2018-07-27
Supplement: 00085472can180951-sup-199337_3_supp_4846222_phqhfd.xlsx [file 00085472can180951-sup-199337_3_supp_4846222_phqhfd.xlsx]

## Sheet: Sheet1
Supplementary Table S1. Internal performance of ovarian and cross-tissue gene expression prediction models built using GTEx data
Model	r2a	All	Protein	lncRNAs	miRNAs	othersb
Ovarian	0.01	8580	5969	2331	96	184
	0.04	5521	3869	1492	50	110
	0.09	3049	2138	827	20	64
	0.16	1480	1035	403	8	34
	N	11921	8302	3226	139	254
Cross-tissue	0.01	14085	9951	3798	60	276
	0.04	9822	6830	2747	35	210
	0.09	6710	4543	1979	27	161
	0.16	4472	2974	1363	22	113
	N	18896	13371	5016	109	400
Protein: Protein coding genes; lncRNAs: long non-coding RNAs; miRNAs: microRNAs
a r2 of tissue model's correlation to gene's measured transcriptome (prediction performance)
b including processed transcripts, immunoglobulin genes, and T cell receptor genes
