# Supplementary material for: A Transcriptome-Wide Association Study Among 97,898 Women to Identify Candidate Susceptibility Genes for Epithelial Ovarian Cancer Risk
Source: Oxford University Press journal article supplement (doi:10.1158/0008-5472.can-18-0951), 2018-07-27
Supplement: 00085472can180951-sup-199337_3_supp_4846226_ppqpfp.xlsx [file 00085472can180951-sup-199337_3_supp_4846226_ppqpfp.xlsx]

## Sheet: Sheet1
Supplementary Table S6. Association results between associated genes with P < 2.21 × 10-6 and risk of different histotypes of epithelial ovarian cancer.
Region	Gene ID	Gencode ID	Z-score	P valuea	r2b	Nc	covariance_Nc	model_Nc	Model	Histotype
1p34.3	DNALI1	ENSG00000163879.9	6.13403	8.56789e-10	0.287822	90	90	90	cross-tissue	Combined alld
1p34.3	DNALI1	ENSG00000163879.9	6.84152	7.83582e-12	0.287822	90	90	90	cross-tissue	Serous: high-graded
1p34.3	DNALI1	ENSG00000163879.9	-0.457887	0.647034	0.287822	90	90	90	cross-tissue	Clear celle
1p34.3	DNALI1	ENSG00000163879.9	-0.770568	0.440963	0.287822	90	90	90	cross-tissue	Endometrioide
1p34.3	DNALI1	ENSG00000163879.9	2.28072	0.0225648	0.287822	90	90	90	cross-tissue	Invasive mucinouse
1p34.3	DNALI1	ENSG00000163879.9	2.10401	0.0353775	0.287822	90	90	90	cross-tissue	Invasive/borderline mucinouse
1p34.3	DNALI1	ENSG00000163879.9	0.639211	0.522686	0.287822	90	90	90	cross-tissue	Mucinous: borderlinee
1p34.3	DNALI1	ENSG00000163879.9	4.32323	1.53758e-05	0.287822	90	90	90	cross-tissue	All: invasivee
1p34.3	DNALI1	ENSG00000163879.9	1.81787	0.0690833	0.287822	90	90	90	cross-tissue	Serous: low-grade + borderlinee
1p34.3	DNALI1	ENSG00000163879.9	4.98831	6.09e-07	0.287822	90	90	90	cross-tissue	Serous: invasivee
1p34.3	DNALI1	ENSG00000163879.9	5.27121	1.35527e-07	0.287822	90	90	90	cross-tissue	Serous: high-gradee
1p34.3	DNALI1	ENSG00000163879.9	2.14736	0.0317648	0.287822	90	90	90	cross-tissue	Serous: borderlinee
1p34.3	DNALI1	ENSG00000163879.9	0.306456	0.759258	0.287822	90	90	90	cross-tissue	Serous: low-gradee
2q31.1	HOXD3	ENSG00000128652.7	4.16064	3.17361e-05	0.0399325	52	52	52	cross-tissue	Combined alld
2q31.1	HOXD3	ENSG00000128652.7	4.24183	2.21704e-05	0.0399325	52	52	52	cross-tissue	Serous: high-graded
2q31.1	HOXD3	ENSG00000128652.7	0.594118	0.552434	0.0399325	52	52	52	cross-tissue	Clear celle
2q31.1	HOXD3	ENSG00000128652.7	1.11732	0.263856	0.0399325	52	52	52	cross-tissue	Endometrioide
2q31.1	HOXD3	ENSG00000128652.7	0.331985	0.7399	0.0399325	52	52	52	cross-tissue	Invasive mucinouse
2q31.1	HOXD3	ENSG00000128652.7	3.76724	0.000165063	0.0399325	52	52	52	cross-tissue	Invasive/borderline mucinouse
2q31.1	HOXD3	ENSG00000128652.7	5.16362	2.42217e-07	0.0399325	52	52	52	cross-tissue	Mucinous: borderlinee
2q31.1	HOXD3	ENSG00000128652.7	3.57697	0.000347598	0.0399325	52	52	52	cross-tissue	All: invasivee
2q31.1	HOXD3	ENSG00000128652.7	1.40192	0.16094	0.0399325	52	52	52	cross-tissue	Serous: low-grade + borderlinee
2q31.1	HOXD3	ENSG00000128652.7	3.66879	0.000243703	0.0399325	52	52	52	cross-tissue	Serous: invasivee
2q31.1	HOXD3	ENSG00000128652.7	3.34959	0.000809306	0.0399325	52	52	52	cross-tissue	Serous: high-gradee
2q31.1	HOXD3	ENSG00000128652.7	0.389932	0.696587	0.0399325	52	52	52	cross-tissue	Serous: borderlinee
2q31.1	HOXD3	ENSG00000128652.7	1.6297	0.103166	0.0399325	52	52	52	cross-tissue	Serous: low-gradee
2q31.1	HOXD1	ENSG00000128645.11	5.73131	9.96554e-09	0.0382788	42	42	42	cross-tissue	Combined alld
2q31.1	HOXD1	ENSG00000128645.11	6.06572	1.31365e-09	0.0382788	42	42	42	cross-tissue	Serous: high-graded
2q31.1	HOXD1	ENSG00000128645.11	-0.295623	0.767518	0.0382788	42	42	42	cross-tissue	Clear celle
2q31.1	HOXD1	ENSG00000128645.11	3.11492	0.00183994	0.0382788	42	42	42	cross-tissue	Endometrioide
2q31.1	HOXD1	ENSG00000128645.11	1.31941	0.187032	0.0382788	42	42	42	cross-tissue	Invasive mucinouse
2q31.1	HOXD1	ENSG00000128645.11	4.44543	8.77164e-06	0.0382788	42	42	42	cross-tissue	Invasive/borderline mucinouse
2q31.1	HOXD1	ENSG00000128645.11	5.24143	1.59333e-07	0.0382788	42	42	42	cross-tissue	Mucinous: borderlinee
2q31.1	HOXD1	ENSG00000128645.11	4.58888	4.45633e-06	0.0382788	42	42	42	cross-tissue	All: invasivee
2q31.1	HOXD1	ENSG00000128645.11	3.53279	0.000411196	0.0382788	42	42	42	cross-tissue	Serous: low-grade + borderlinee
2q31.1	HOXD1	ENSG00000128645.11	4.9223	8.55e-07	0.0382788	42	42	42	cross-tissue	Serous: invasivee
2q31.1	HOXD1	ENSG00000128645.11	4.54968	5.37277e-06	0.0382788	42	42	42	cross-tissue	Serous: high-gradee
2q31.1	HOXD1	ENSG00000128645.11	2.75607	0.00585004	0.0382788	42	42	42	cross-tissue	Serous: borderlinee
2q31.1	HOXD1	ENSG00000128645.11	2.1777	0.0294284	0.0382788	42	42	42	cross-tissue	Serous: low-gradee
3q25.31	LEKR1	ENSG00000197980.7	-5.69716	1.21818e-08	0.463426	33	33	33	cross-tissue	Combined alld
3q25.31	LEKR1	ENSG00000197980.7	-5.81016	6.24122e-09	0.463426	33	33	33	cross-tissue	Serous: high-graded
3q25.31	LEKR1	ENSG00000197980.7	-1.9554	0.050536	0.463426	33	33	33	cross-tissue	Clear celle
3q25.31	LEKR1	ENSG00000197980.7	-1.6081	0.107813	0.463426	33	33	33	cross-tissue	Endometrioide
3q25.31	LEKR1	ENSG00000197980.7	0.334515	0.737991	0.463426	33	33	33	cross-tissue	Invasive mucinouse
3q25.31	LEKR1	ENSG00000197980.7	0.426879	0.669467	0.463426	33	33	33	cross-tissue	Invasive/borderline mucinouse
3q25.31	LEKR1	ENSG00000197980.7	0.411753	0.68052	0.463426	33	33	33	cross-tissue	Mucinous: borderlinee
3q25.31	LEKR1	ENSG00000197980.7	-5.29043	1.2203e-07	0.463426	33	33	33	cross-tissue	All: invasivee
3q25.31	LEKR1	ENSG00000197980.7	-0.126868	0.899045	0.463426	33	33	33	cross-tissue	Serous: low-grade + borderlinee
3q25.31	LEKR1	ENSG00000197980.7	-5.47184	4.45e-08	0.463426	33	33	33	cross-tissue	Serous: invasivee
3q25.31	LEKR1	ENSG00000197980.7	-5.3209	1.03254e-07	0.463426	33	33	33	cross-tissue	Serous: high-gradee
3q25.31	LEKR1	ENSG00000197980.7	1.02343	0.306105	0.463426	33	33	33	cross-tissue	Serous: borderlinee
3q25.31	LEKR1	ENSG00000197980.7	-1.45706	0.1451	0.463426	33	33	33	cross-tissue	Serous: low-gradee
8q21.13	CHMP4C	ENSG00000164695.4	-6.23622	4.48265e-10	0.465422	39	39	39	cross-tissue	Combined alld
8q21.13	CHMP4C	ENSG00000164695.4	-6.58991	4.40097e-11	0.465422	39	39	39	cross-tissue	Serous: high-graded
8q21.13	CHMP4C	ENSG00000164695.4	-0.971465	0.331317	0.465422	39	39	39	cross-tissue	Clear celle
8q21.13	CHMP4C	ENSG00000164695.4	0.0187377	0.98505	0.465422	39	39	39	cross-tissue	Endometrioide
8q21.13	CHMP4C	ENSG00000164695.4	-0.385783	0.699657	0.465422	39	39	39	cross-tissue	Invasive mucinouse
8q21.13	CHMP4C	ENSG00000164695.4	0.249521	0.802958	0.465422	39	39	39	cross-tissue	Invasive/borderline mucinouse
8q21.13	CHMP4C	ENSG00000164695.4	0.899004	0.368651	0.465422	39	39	39	cross-tissue	Mucinous: borderlinee
8q21.13	CHMP4C	ENSG00000164695.4	-6.03836	1.55692e-09	0.465422	39	39	39	cross-tissue	All: invasivee
8q21.13	CHMP4C	ENSG00000164695.4	0.641442	0.521235	0.465422	39	39	39	cross-tissue	Serous: low-grade + borderlinee
8q21.13	CHMP4C	ENSG00000164695.4	-6.5309	6.54e-11	0.465422	39	39	39	cross-tissue	Serous: invasivee
8q21.13	CHMP4C	ENSG00000164695.4	-6.68931	2.24228e-11	0.465422	39	39	39	cross-tissue	Serous: high-gradee
8q21.13	CHMP4C	ENSG00000164695.4	1.22743	0.21966	0.465422	39	39	39	cross-tissue	Serous: borderlinee
8q21.13	CHMP4C	ENSG00000164695.4	-0.545169	0.585637	0.465422	39	39	39	cross-tissue	Serous: low-gradee
9p22.3	CCDC171	ENSG00000164989.11	-8.16874	3.11622e-16	0.0230454	8	8	8	ovary	Combined alld
9p22.3	CCDC171	ENSG00000164989.11	-8.59842	8.08208e-18	0.0230454	8	8	8	ovary	Serous: high-graded
9p22.3	CCDC171	ENSG00000164989.11	-1.43242	0.152024	0.0230454	8	8	8	ovary	Clear celle
9p22.3	CCDC171	ENSG00000164989.11	-2.46771	0.0135979	0.0230454	8	8	8	ovary	Endometrioide
9p22.3	CCDC171	ENSG00000164989.11	-1.97592	0.0481644	0.260571	92	92	92	cross-tissue	Invasive mucinouse
9p22.3	CCDC171	ENSG00000164989.11	-0.876176	0.380935	0.260571	92	92	92	cross-tissue	Invasive/borderline mucinouse
9p22.3	CCDC171	ENSG00000164989.11	1.42761	0.153405	0.0230454	8	8	8	ovary	Mucinous: borderlinee
9p22.3	CCDC171	ENSG00000164989.11	-6.9703	3.16274e-12	0.0230454	8	8	8	ovary	All: invasivee
9p22.3	CCDC171	ENSG00000164989.11	-0.821573	0.41132	0.0230454	8	8	8	ovary	Serous: low-grade + borderlinee
9p22.3	CCDC171	ENSG00000164989.11	-7.45949	8.68585e-14	0.0230454	8	8	8	ovary	Serous: invasivee
9p22.3	CCDC171	ENSG00000164989.11	-7.46305	8.45422e-14	0.0230454	8	8	8	ovary	Serous: high-gradee
9p22.3	CCDC171	ENSG00000164989.11	0.604136	0.545753	0.260571	92	92	92	cross-tissue	Serous: borderlinee
9p22.3	CCDC171	ENSG00000164989.11	-1.28134	0.200074	0.0230454	8	8	8	ovary	Serous: low-gradee
9p22.3	C9orf92	ENSG00000205549.4	-4.43216	9.32926e-06	0.147555	51	51	51	ovary	Combined alld
9p22.3	C9orf92	ENSG00000205549.4	-5.16183	2.44546e-07	0.147555	51	51	51	ovary	Serous: high-graded
9p22.3	C9orf92	ENSG00000205549.4	0.677241	0.498253	0.147555	51	51	51	ovary	Clear celle
9p22.3	C9orf92	ENSG00000205549.4	-0.710762	0.477232	0.147555	51	51	51	ovary	Endometrioide
9p22.3	C9orf92	ENSG00000205549.4	-0.372047	0.709858	0.147555	51	51	51	ovary	Invasive mucinouse
9p22.3	C9orf92	ENSG00000205549.4	-0.081306	0.935199	0.147555	51	51	51	ovary	Invasive/borderline mucinouse
9p22.3	C9orf92	ENSG00000205549.4	0.409944	0.681847	0.147555	51	51	51	ovary	Mucinous: borderlinee
9p22.3	C9orf92	ENSG00000205549.4	-3.23686	0.00120854	0.147555	51	51	51	ovary	All: invasivee
9p22.3	C9orf92	ENSG00000205549.4	0.701524	0.482976	0.147555	51	51	51	ovary	Serous: low-grade + borderlinee
9p22.3	C9orf92	ENSG00000205549.4	-3.99841	6.37688e-05	0.147555	51	51	51	ovary	Serous: invasivee
9p22.3	C9orf92	ENSG00000205549.4	-4.25265	2.11253e-05	0.147555	51	51	51	ovary	Serous: high-gradee
9p22.3	C9orf92	ENSG00000205549.4	0.699342	0.484338	0.147555	51	51	51	ovary	Serous: borderlinee
9p22.3	C9orf92	ENSG00000205549.4	0.468354	0.639531	0.147555	51	51	51	ovary	Serous: low-gradee
9q34.2	ABO	ENSG00000175164.9	5.20823	1.90647e-07	0.494671	53	53	53	ovary	Combined alld
9q34.2	ABO	ENSG00000175164.9	5.4387	5.36697e-08	0.494671	53	53	53	ovary	Serous: high-graded
9q34.2	ABO	ENSG00000175164.9	0.193271	0.846747	0.518255	68	69	69	cross-tissue	Clear celle
9q34.2	ABO	ENSG00000175164.9	1.66894	0.0951301	0.494671	53	53	53	ovary	Endometrioide
9q34.2	ABO	ENSG00000175164.9	1.51306	0.130264	0.494671	53	53	53	ovary	Invasive mucinouse
9q34.2	ABO	ENSG00000175164.9	-2.11758	0.0342111	0.518255	68	69	69	cross-tissue	Invasive/borderline mucinouse
9q34.2	ABO	ENSG00000175164.9	-1.9269	0.0539917	0.518255	68	69	69	cross-tissue	Mucinous: borderlinee
9q34.2	ABO	ENSG00000175164.9	4.78771	1.68697e-06	0.494671	53	53	53	ovary	All: invasivee
9q34.2	ABO	ENSG00000175164.9	0.97866	0.327748	0.518255	68	69	69	cross-tissue	Serous: low-grade + borderlinee
9q34.2	ABO	ENSG00000175164.9	5.09765	3.4389e-07	0.494671	53	53	53	ovary	Serous: invasivee
9q34.2	ABO	ENSG00000175164.9	5.02193	5.1154e-07	0.494671	53	53	53	ovary	Serous: high-gradee
9q34.2	ABO	ENSG00000175164.9	-0.765285	0.444102	0.494671	53	53	53	ovary	Serous: borderlinee
9q34.2	ABO	ENSG00000175164.9	2.69261	0.00708957	0.518255	68	69	69	cross-tissue	Serous: low-gradee
10q24.33	OBFC1	ENSG00000107960.6	-2.16395	0.0304683	0.0104541	28	28	28	cross-tissue	Combined alld
10q24.33	OBFC1	ENSG00000107960.6	-2.30732	0.0210371	0.0104541	28	28	28	cross-tissue	Serous: high-graded
10q24.33	OBFC1	ENSG00000107960.6	0.0908592	0.927604	0.0104541	28	28	28	cross-tissue	Clear celle
10q24.33	OBFC1	ENSG00000107960.6	-1.71351	0.0866182	0.0104541	28	28	28	cross-tissue	Endometrioide
10q24.33	OBFC1	ENSG00000107960.6	-0.890969	0.372946	0.0104541	28	28	28	cross-tissue	Invasive mucinouse
10q24.33	OBFC1	ENSG00000107960.6	-0.371118	0.71055	0.0104541	28	28	28	cross-tissue	Invasive/borderline mucinouse
10q24.33	OBFC1	ENSG00000107960.6	0.456677	0.647903	0.0104541	28	28	28	cross-tissue	Mucinous: borderlinee
10q24.33	OBFC1	ENSG00000107960.6	-1.99798	0.0457183	0.0104541	28	28	28	cross-tissue	All: invasivee
10q24.33	OBFC1	ENSG00000107960.6	-4.68145	2.84857e-06	0.0104541	28	28	28	cross-tissue	Serous: low-grade + borderlinee
10q24.33	OBFC1	ENSG00000107960.6	-2.18528	0.0288683	0.0104541	28	28	28	cross-tissue	Serous: invasivee
10q24.33	OBFC1	ENSG00000107960.6	-2.01836	0.043554	0.0104541	28	28	28	cross-tissue	Serous: high-gradee
10q24.33	OBFC1	ENSG00000107960.6	-5.0861	3.6551e-07	0.0104541	28	28	28	cross-tissue	Serous: borderlinee
10q24.33	OBFC1	ENSG00000107960.6	-1.03825	0.299155	0.0104541	28	28	28	cross-tissue	Serous: low-gradee
11q14.2	FZD4	ENSG00000174804.3	3.90779	9.31445e-05	0.0678607	8	8	8	cross-tissue	Combined alld
11q14.2	FZD4	ENSG00000174804.3	5.07717	3.83095e-07	0.0678607	8	8	8	cross-tissue	Serous: high-graded
11q14.2	FZD4	ENSG00000174804.3	0.0398204	0.968236	0.128831	56	56	56	ovary	Clear celle
11q14.2	FZD4	ENSG00000174804.3	0.42001	0.674478	0.128831	56	56	56	ovary	Endometrioide
11q14.2	FZD4	ENSG00000174804.3	0.745374	0.456046	0.128831	56	56	56	ovary	Invasive mucinouse
11q14.2	FZD4	ENSG00000174804.3	0.50368	0.614486	0.0678607	8	8	8	cross-tissue	Invasive/borderline mucinouse
11q14.2	FZD4	ENSG00000174804.3	1.45027	0.146983	0.0678607	8	8	8	cross-tissue	Mucinous: borderlinee
11q14.2	FZD4	ENSG00000174804.3	3.39166	0.000694715	0.0678607	8	8	8	cross-tissue	All: invasivee
11q14.2	FZD4	ENSG00000174804.3	1.54885	0.121417	0.0678607	8	8	8	cross-tissue	Serous: low-grade + borderlinee
11q14.2	FZD4	ENSG00000174804.3	4.75137	2.02e-06	0.0678607	8	8	8	cross-tissue	Serous: invasivee
11q14.2	FZD4	ENSG00000174804.3	4.41659	1.00271e-05	0.0678607	8	8	8	cross-tissue	Serous: high-gradee
11q14.2	FZD4	ENSG00000174804.3	1.39169	0.164016	0.128831	56	56	56	ovary	Serous: borderlinee
11q14.2	FZD4	ENSG00000174804.3	2.73768	0.00618734	0.0678607	8	8	8	cross-tissue	Serous: low-gradee
15q26.1	RCCD1	ENSG00000166965.8	-4.38336	1.16861e-05	0.587961	38	38	38	cross-tissue	Combined alld
15q26.1	RCCD1	ENSG00000166965.8	-4.51331	6.38233e-06	0.587961	38	38	38	cross-tissue	Serous: high-graded
15q26.1	RCCD1	ENSG00000166965.8	0.361763	0.717529	0.587961	38	38	38	cross-tissue	Clear celle
15q26.1	RCCD1	ENSG00000166965.8	-1.73613	0.0825409	0.084628	22	22	22	ovary	Endometrioide
15q26.1	RCCD1	ENSG00000166965.8	1.0396	0.298526	0.084628	22	22	22	ovary	Invasive mucinouse
15q26.1	RCCD1	ENSG00000166965.8	-0.836365	0.40295	0.587961	38	38	38	cross-tissue	Invasive/borderline mucinouse
15q26.1	RCCD1	ENSG00000166965.8	-1.14528	0.252092	0.587961	38	38	38	cross-tissue	Mucinous: borderlinee
15q26.1	RCCD1	ENSG00000166965.8	-5.05448	4.31571e-07	0.587961	38	38	38	cross-tissue	All: invasivee
15q26.1	RCCD1	ENSG00000166965.8	-1.5555	0.119827	0.587961	38	38	38	cross-tissue	Serous: low-grade + borderlinee
15q26.1	RCCD1	ENSG00000166965.8	-5.40847	6.36e-08	0.587961	38	38	38	cross-tissue	Serous: invasivee
15q26.1	RCCD1	ENSG00000166965.8	-5.46475	4.63572e-08	0.587961	38	38	38	cross-tissue	Serous: high-gradee
15q26.1	RCCD1	ENSG00000166965.8	-1.49329	0.13536	0.587961	38	38	38	cross-tissue	Serous: borderlinee
15q26.1	RCCD1	ENSG00000166965.8	1.58195	0.11366	0.084628	22	22	22	ovary	Serous: low-gradee
17q21.31	ADAM11	ENSG00000073670.9	-4.15082	3.31292e-05	0.0482325	12	12	12	ovary	Combined alld
17q21.31	ADAM11	ENSG00000073670.9	-4.85682	1.19287e-06	0.0482325	12	12	12	ovary	Serous: high-graded
17q21.31	ADAM11	ENSG00000073670.9	-0.0722574	0.942397	0.0482325	12	12	12	ovary	Clear celle
17q21.31	ADAM11	ENSG00000073670.9	-0.441919	0.658548	0.156714	12	12	12	cross-tissue	Endometrioide
17q21.31	ADAM11	ENSG00000073670.9	-0.334332	0.738129	0.0482325	12	12	12	ovary	Invasive mucinouse
17q21.31	ADAM11	ENSG00000073670.9	1.42691	0.153607	0.156714	12	12	12	cross-tissue	Invasive/borderline mucinouse
17q21.31	ADAM11	ENSG00000073670.9	2.02267	0.0431076	0.156714	12	12	12	cross-tissue	Mucinous: borderlinee
17q21.31	ADAM11	ENSG00000073670.9	-2.59946	0.00933698	0.0482325	12	12	12	ovary	All: invasivee
17q21.31	ADAM11	ENSG00000073670.9	-1.09599	0.273084	0.156714	12	12	12	cross-tissue	Serous: low-grade + borderlinee
17q21.31	ADAM11	ENSG00000073670.9	-3.26739	0.00108545	0.0482325	12	12	12	ovary	Serous: invasivee
17q21.31	ADAM11	ENSG00000073670.9	-3.51961	0.000432187	0.0482325	12	12	12	ovary	Serous: high-gradee
17q21.31	ADAM11	ENSG00000073670.9	-1.26728	0.205056	0.156714	12	12	12	cross-tissue	Serous: borderlinee
17q21.31	ADAM11	ENSG00000073670.9	0.299657	0.764439	0.0482325	12	12	12	ovary	Serous: low-gradee
17q21.31	AC091132.1	ENSG00000236234.1	-6.73363	1.65483e-11	0.0298316	28	28	28	cross-tissue	Combined alld
17q21.31	AC091132.1	ENSG00000236234.1	-7.17912	7.01624e-13	0.0298316	28	28	28	cross-tissue	Serous: high-graded
17q21.31	AC091132.1	ENSG00000236234.1	-1.34201	0.179592	0.0298316	28	28	28	cross-tissue	Clear celle
17q21.31	AC091132.1	ENSG00000236234.1	-2.41426	0.0157672	0.0298316	28	28	28	cross-tissue	Endometrioide
17q21.31	AC091132.1	ENSG00000236234.1	-0.564073	0.572705	0.0298316	28	28	28	cross-tissue	Invasive mucinouse
17q21.31	AC091132.1	ENSG00000236234.1	0.0592162	0.95278	0.0298316	28	28	28	cross-tissue	Invasive/borderline mucinouse
17q21.31	AC091132.1	ENSG00000236234.1	1.06665	0.286129	0.0298316	28	28	28	cross-tissue	Mucinous: borderlinee
17q21.31	AC091132.1	ENSG00000236234.1	-5.42442	5.81429e-08	0.0298316	28	28	28	cross-tissue	All: invasivee
17q21.31	AC091132.1	ENSG00000236234.1	-0.141962	0.88711	0.0298316	28	28	28	cross-tissue	Serous: low-grade + borderlinee
17q21.31	AC091132.1	ENSG00000236234.1	-5.8793	4.12e-09	0.0298316	28	28	28	cross-tissue	Serous: invasivee
17q21.31	AC091132.1	ENSG00000236234.1	-6.21403	5.16417e-10	0.0298316	28	28	28	cross-tissue	Serous: high-gradee
17q21.31	AC091132.1	ENSG00000236234.1	-0.233816	0.815128	0.0298316	28	28	28	cross-tissue	Serous: borderlinee
17q21.31	AC091132.1	ENSG00000236234.1	0.237351	0.812384	0.0298316	28	28	28	cross-tissue	Serous: low-gradee
17q21.31	PLEKHM1	ENSG00000225190.4	4.37503	1.21415e-05	0.0116368	11	11	11	cross-tissue	Combined alld
17q21.31	PLEKHM1	ENSG00000225190.4	4.7996	1.58981e-06	0.0116368	11	11	11	cross-tissue	Serous: high-graded
17q21.31	PLEKHM1	ENSG00000225190.4	0.924283	0.355339	0.0116368	11	11	11	cross-tissue	Clear celle
17q21.31	PLEKHM1	ENSG00000225190.4	0.930219	0.352258	0.0116368	11	11	11	cross-tissue	Endometrioide
17q21.31	PLEKHM1	ENSG00000225190.4	-2.00972	0.0444608	0.0103631	29	29	29	ovary	Invasive mucinouse
17q21.31	PLEKHM1	ENSG00000225190.4	-1.56523	0.11753	0.0103631	29	29	29	ovary	Invasive/borderline mucinouse
17q21.31	PLEKHM1	ENSG00000225190.4	-1.71127	0.0870322	0.0116368	11	11	11	cross-tissue	Mucinous: borderlinee
17q21.31	PLEKHM1	ENSG00000225190.4	2.43181	0.0150236	0.0116368	11	11	11	cross-tissue	All: invasivee
17q21.31	PLEKHM1	ENSG00000225190.4	1.55855	0.119104	0.0103631	29	29	29	ovary	Serous: low-grade + borderlinee
17q21.31	PLEKHM1	ENSG00000225190.4	2.71302	0.00666729	0.0116368	11	11	11	cross-tissue	Serous: invasivee
17q21.31	PLEKHM1	ENSG00000225190.4	2.76538	0.00568563	0.0116368	11	11	11	cross-tissue	Serous: high-gradee
17q21.31	PLEKHM1	ENSG00000225190.4	0.731805	0.464287	0.0103631	29	29	29	ovary	Serous: borderlinee
17q21.31	PLEKHM1	ENSG00000225190.4	1.62926	0.103258	0.0103631	29	29	29	ovary	Serous: low-gradee
17q21.31	RP11-798G7.8	ENSG00000266918.1	6.60733	3.91316e-11	0.0541275	210	210	210	ovary	Combined alld
17q21.31	RP11-798G7.8	ENSG00000266918.1	6.578	4.76828e-11	0.0541275	210	210	210	ovary	Serous: high-graded
17q21.31	RP11-798G7.8	ENSG00000266918.1	0.515345	0.606312	0.0541275	210	210	210	ovary	Clear celle
17q21.31	RP11-798G7.8	ENSG00000266918.1	2.27698	0.0227874	0.0541275	210	210	210	ovary	Endometrioide
17q21.31	RP11-798G7.8	ENSG00000266918.1	1.83561	0.0664159	0.0541275	210	210	210	ovary	Invasive mucinouse
17q21.31	RP11-798G7.8	ENSG00000266918.1	0.840241	0.400773	0.0541275	210	210	210	ovary	Invasive/borderline mucinouse
17q21.31	RP11-798G7.8	ENSG00000266918.1	-0.880066	0.378823	0.0541275	210	210	210	ovary	Mucinous: borderlinee
17q21.31	RP11-798G7.8	ENSG00000266918.1	5.02704	4.98106e-07	0.0541275	210	210	210	ovary	All: invasivee
17q21.31	RP11-798G7.8	ENSG00000266918.1	-1.12202	0.261853	0.0541275	210	210	210	ovary	Serous: low-grade + borderlinee
17q21.31	RP11-798G7.8	ENSG00000266918.1	4.88228	1.04866e-06	0.0541275	210	210	210	ovary	Serous: invasivee
17q21.31	RP11-798G7.8	ENSG00000266918.1	5.18038	2.21431e-07	0.0541275	210	210	210	ovary	Serous: high-gradee
17q21.31	RP11-798G7.8	ENSG00000266918.1	-1.41141	0.158124	0.0541275	210	210	210	ovary	Serous: borderlinee
17q21.31	RP11-798G7.8	ENSG00000266918.1	-0.088991	0.929089	0.0541275	210	210	210	ovary	Serous: low-gradee
17q21.31	CRHR1	ENSG00000120088.10	9.08666	1.02132e-19	0.602413	467	467	467	cross-tissue	Combined alld
17q21.31	CRHR1	ENSG00000120088.10	8.61118	7.23098e-18	0.602413	467	467	467	cross-tissue	Serous: high-graded
17q21.31	CRHR1	ENSG00000120088.10	1.22655	0.219991	0.492351	36	36	36	ovary	Clear celle
17q21.31	CRHR1	ENSG00000120088.10	3.40535	0.00066079	0.602413	467	467	467	cross-tissue	Endometrioide
17q21.31	CRHR1	ENSG00000120088.10	2.48359	0.0130066	0.602413	467	467	467	cross-tissue	Invasive mucinouse
17q21.31	CRHR1	ENSG00000120088.10	1.18545	0.235841	0.602413	467	467	467	cross-tissue	Invasive/borderline mucinouse
17q21.31	CRHR1	ENSG00000120088.10	-1.15086	0.249788	0.492351	36	36	36	ovary	Mucinous: borderlinee
17q21.31	CRHR1	ENSG00000120088.10	7.35154	1.95938e-13	0.602413	467	467	467	cross-tissue	All: invasivee
17q21.31	CRHR1	ENSG00000120088.10	-1.29394	0.195687	0.602413	467	467	467	cross-tissue	Serous: low-grade + borderlinee
17q21.31	CRHR1	ENSG00000120088.10	6.7111	1.93e-11	0.602413	467	467	467	cross-tissue	Serous: invasivee
17q21.31	CRHR1	ENSG00000120088.10	7.05262	1.75575e-12	0.602413	467	467	467	cross-tissue	Serous: high-gradee
17q21.31	CRHR1	ENSG00000120088.10	-1.702	0.0887557	0.602413	467	467	467	cross-tissue	Serous: borderlinee
17q21.31	CRHR1	ENSG00000120088.10	0.100383	0.92004	0.602413	467	467	467	cross-tissue	Serous: low-gradee
17q21.31	RP11-105N13.4	ENSG00000263715.2	6.55576	5.53589e-11	0.0529909	19	19	19	ovary	Combined alld
17q21.31	RP11-105N13.4	ENSG00000263715.2	6.76518	1.33146e-11	0.0529909	19	19	19	ovary	Serous: high-graded
17q21.31	RP11-105N13.4	ENSG00000263715.2	0.492333	0.622484	0.0529909	19	19	19	ovary	Clear celle
17q21.31	RP11-105N13.4	ENSG00000263715.2	0.842152	0.399703	0.0529909	19	19	19	ovary	Endometrioide
17q21.31	RP11-105N13.4	ENSG00000263715.2	1.18687	0.235279	0.0529909	19	19	19	ovary	Invasive mucinouse
17q21.31	RP11-105N13.4	ENSG00000263715.2	-0.322259	0.747257	0.0529909	19	19	19	ovary	Invasive/borderline mucinouse
17q21.31	RP11-105N13.4	ENSG00000263715.2	-1.87974	0.0601432	0.0529909	19	19	19	ovary	Mucinous: borderlinee
17q21.31	RP11-105N13.4	ENSG00000263715.2	5.10065	3.38492e-07	0.0529909	19	19	19	ovary	All: invasivee
17q21.31	RP11-105N13.4	ENSG00000263715.2	-1.22282	0.221396	0.0529909	19	19	19	ovary	Serous: low-grade + borderlinee
17q21.31	RP11-105N13.4	ENSG00000263715.2	5.25207	1.50397e-07	0.0529909	19	19	19	ovary	Serous: invasivee
17q21.31	RP11-105N13.4	ENSG00000263715.2	5.53143	3.17635e-08	0.0529909	19	19	19	ovary	Serous: high-gradee
17q21.31	RP11-105N13.4	ENSG00000263715.2	-1.40403	0.160311	0.0529909	19	19	19	ovary	Serous: borderlinee
17q21.31	RP11-105N13.4	ENSG00000263715.2	-0.270128	0.787062	0.0529909	19	19	19	ovary	Serous: low-gradee
17q21.31	MAPT-AS1	ENSG00000264589.1	8.3323	7.92899e-17	0.104255	30	30	30	cross-tissue	Combined alld
17q21.31	MAPT-AS1	ENSG00000264589.1	7.74442	9.6016e-15	0.104255	30	30	30	cross-tissue	Serous: high-graded
17q21.31	MAPT-AS1	ENSG00000264589.1	0.531969	0.594748	0.104255	30	30	30	cross-tissue	Clear celle
17q21.31	MAPT-AS1	ENSG00000264589.1	3.12368	0.00178602	0.104255	30	30	30	cross-tissue	Endometrioide
17q21.31	MAPT-AS1	ENSG00000264589.1	2.28599	0.0222549	0.104255	30	30	30	cross-tissue	Invasive mucinouse
17q21.31	MAPT-AS1	ENSG00000264589.1	1.2786	0.201039	0.104255	30	30	30	cross-tissue	Invasive/borderline mucinouse
17q21.31	MAPT-AS1	ENSG00000264589.1	-0.758892	0.447917	0.104255	30	30	30	cross-tissue	Mucinous: borderlinee
17q21.31	MAPT-AS1	ENSG00000264589.1	6.62071	3.57478e-11	0.104255	30	30	30	cross-tissue	All: invasivee
17q21.31	MAPT-AS1	ENSG00000264589.1	-1.14642	0.251622	0.104255	30	30	30	cross-tissue	Serous: low-grade + borderlinee
17q21.31	MAPT-AS1	ENSG00000264589.1	5.83704	5.31e-09	0.104255	30	30	30	cross-tissue	Serous: invasivee
17q21.31	MAPT-AS1	ENSG00000264589.1	6.13389	8.57542e-10	0.104255	30	30	30	cross-tissue	Serous: high-gradee
17q21.31	MAPT-AS1	ENSG00000264589.1	-1.53359	0.125132	0.104255	30	30	30	cross-tissue	Serous: borderlinee
17q21.31	MAPT-AS1	ENSG00000264589.1	0.0970862	0.922658	0.104255	30	30	30	cross-tissue	Serous: low-gradee
17q21.31	KANSL1	ENSG00000120071.8	4.70063	2.59354e-06	0.175008	75	75	75	ovary	Combined alld
17q21.31	KANSL1	ENSG00000120071.8	4.73897	2.14804e-06	0.175008	75	75	75	ovary	Serous: high-graded
17q21.31	KANSL1	ENSG00000120071.8	0.664864	0.506137	0.175008	75	75	75	ovary	Clear celle
17q21.31	KANSL1	ENSG00000120071.8	1.72861	0.0838791	0.175008	75	75	75	ovary	Endometrioide
17q21.31	KANSL1	ENSG00000120071.8	1.99985	0.0455162	0.175008	75	75	75	ovary	Invasive mucinouse
17q21.31	KANSL1	ENSG00000120071.8	1.79171	0.0731796	0.175008	75	75	75	ovary	Invasive/borderline mucinouse
17q21.31	KANSL1	ENSG00000120071.8	0.512356	0.608402	0.431285	39	39	39	cross-tissue	Mucinous: borderlinee
17q21.31	KANSL1	ENSG00000120071.8	4.39064	1.13018e-05	0.175008	75	75	75	ovary	All: invasivee
17q21.31	KANSL1	ENSG00000120071.8	-0.51052	0.609687	0.431285	39	39	39	cross-tissue	Serous: low-grade + borderlinee
17q21.31	KANSL1	ENSG00000120071.8	4.48191	7.39776e-06	0.175008	75	75	75	ovary	Serous: invasivee
17q21.31	KANSL1	ENSG00000120071.8	4.6418	3.45382e-06	0.175008	75	75	75	ovary	Serous: high-gradee
17q21.31	KANSL1	ENSG00000120071.8	-1.1342	0.25671	0.431285	39	39	39	cross-tissue	Serous: borderlinee
17q21.31	KANSL1	ENSG00000120071.8	0.832882	0.404911	0.431285	39	39	39	cross-tissue	Serous: low-gradee
17q21.31	RP11-669E14.6	ENSG00000262372.1	-8.84075	9.50752e-19	0.296615	370	370	370	cross-tissue	Combined alld
17q21.31	RP11-669E14.6	ENSG00000262372.1	-8.35323	6.64229e-17	0.296615	370	370	370	cross-tissue	Serous: high-graded
17q21.31	RP11-669E14.6	ENSG00000262372.1	-0.646971	0.51765	0.296615	370	370	370	cross-tissue	Clear celle
17q21.31	RP11-669E14.6	ENSG00000262372.1	-3.22826	0.00124545	0.296615	370	370	370	cross-tissue	Endometrioide
17q21.31	RP11-669E14.6	ENSG00000262372.1	-2.5182	0.0117956	0.296615	370	370	370	cross-tissue	Invasive mucinouse
17q21.31	RP11-669E14.6	ENSG00000262372.1	-1.25598	0.209122	0.296615	370	370	370	cross-tissue	Invasive/borderline mucinouse
17q21.31	RP11-669E14.6	ENSG00000262372.1	1.02542	0.305166	0.296615	370	370	370	cross-tissue	Mucinous: borderlinee
17q21.31	RP11-669E14.6	ENSG00000262372.1	-7.12	1.07924e-12	0.296615	370	370	370	cross-tissue	All: invasivee
17q21.31	RP11-669E14.6	ENSG00000262372.1	1.19489	0.232129	0.296615	370	370	370	cross-tissue	Serous: low-grade + borderlinee
17q21.31	RP11-669E14.6	ENSG00000262372.1	-6.46284	1.03e-10	0.296615	370	370	370	cross-tissue	Serous: invasivee
17q21.31	RP11-669E14.6	ENSG00000262372.1	-6.78434	1.16618e-11	0.296615	370	370	370	cross-tissue	Serous: high-gradee
17q21.31	RP11-669E14.6	ENSG00000262372.1	1.61605	0.106083	0.296615	370	370	370	cross-tissue	Serous: borderlinee
17q21.31	RP11-669E14.6	ENSG00000262372.1	-0.142844	0.886413	0.296615	370	370	370	cross-tissue	Serous: low-gradee
17q21.31	KANSL1-AS1	ENSG00000214401.4	8.45409	2.81276e-17	0.852727	58	58	58	cross-tissue	Combined alld
17q21.31	KANSL1-AS1	ENSG00000214401.4	8.25805	1.48074e-16	0.852727	58	58	58	cross-tissue	Serous: high-graded
17q21.31	KANSL1-AS1	ENSG00000214401.4	0.462468	0.643746	0.852727	58	58	58	cross-tissue	Clear celle
17q21.31	KANSL1-AS1	ENSG00000214401.4	2.75033	0.00595359	0.852727	58	58	58	cross-tissue	Endometrioide
17q21.31	KANSL1-AS1	ENSG00000214401.4	2.56455	0.0103309	0.852727	58	58	58	cross-tissue	Invasive mucinouse
17q21.31	KANSL1-AS1	ENSG00000214401.4	1.49781	0.134184	0.852727	58	58	58	cross-tissue	Invasive/borderline mucinouse
17q21.31	KANSL1-AS1	ENSG00000214401.4	-0.750623	0.45288	0.509351	172	172	172	ovary	Mucinous: borderlinee
17q21.31	KANSL1-AS1	ENSG00000214401.4	6.56615	5.16326e-11	0.852727	58	58	58	cross-tissue	All: invasivee
17q21.31	KANSL1-AS1	ENSG00000214401.4	-1.39443	0.163188	0.509351	172	172	172	ovary	Serous: low-grade + borderlinee
17q21.31	KANSL1-AS1	ENSG00000214401.4	6.21616	5.09e-10	0.852727	58	58	58	cross-tissue	Serous: invasivee
17q21.31	KANSL1-AS1	ENSG00000214401.4	6.51972	7.04384e-11	0.852727	58	58	58	cross-tissue	Serous: high-gradee
17q21.31	KANSL1-AS1	ENSG00000214401.4	-1.87209	0.0611948	0.852727	58	58	58	cross-tissue	Serous: borderlinee
17q21.31	KANSL1-AS1	ENSG00000214401.4	0.242985	0.808017	0.852727	58	58	58	cross-tissue	Serous: low-gradee
17q21.31	LRRC37A	ENSG00000176681.10	8.88252	6.53625e-19	0.544716	599	599	599	ovary	Combined alld
17q21.31	LRRC37A	ENSG00000176681.10	8.38494	5.07512e-17	0.544716	599	599	599	ovary	Serous: high-graded
17q21.31	LRRC37A	ENSG00000176681.10	0.665113	0.505978	0.544716	599	599	599	ovary	Clear celle
17q21.31	LRRC37A	ENSG00000176681.10	3.22325	0.00126743	0.544716	599	599	599	ovary	Endometrioide
17q21.31	LRRC37A	ENSG00000176681.10	2.54606	0.0108946	0.544716	599	599	599	ovary	Invasive mucinouse
17q21.31	LRRC37A	ENSG00000176681.10	1.92285	0.0544984	0.677894	49	49	49	cross-tissue	Invasive/borderline mucinouse
17q21.31	LRRC37A	ENSG00000176681.10	-1.04748	0.294876	0.544716	599	599	599	ovary	Mucinous: borderlinee
17q21.31	LRRC37A	ENSG00000176681.10	7.17363	7.30367e-13	0.544716	599	599	599	ovary	All: invasivee
17q21.31	LRRC37A	ENSG00000176681.10	-1.18507	0.23599	0.544716	599	599	599	ovary	Serous: low-grade + borderlinee
17q21.31	LRRC37A	ENSG00000176681.10	6.50739	7.64663e-11	0.544716	599	599	599	ovary	Serous: invasivee
17q21.31	LRRC37A	ENSG00000176681.10	6.83114	8.42453e-12	0.544716	599	599	599	ovary	Serous: high-gradee
17q21.31	LRRC37A	ENSG00000176681.10	-1.60445	0.108614	0.544716	599	599	599	ovary	Serous: borderlinee
17q21.31	LRRC37A	ENSG00000176681.10	0.327667	0.743164	0.677894	49	49	49	cross-tissue	Serous: low-gradee
17q21.31	LRRC37A2	ENSG00000238083.3	8.71082	3.0169e-18	0.54774	371	371	371	ovary	Combined alld
17q21.31	LRRC37A2	ENSG00000238083.3	8.26145	1.43919e-16	0.54774	371	371	371	ovary	Serous: high-graded
17q21.31	LRRC37A2	ENSG00000238083.3	0.48275	0.629274	0.54774	371	371	371	ovary	Clear celle
17q21.31	LRRC37A2	ENSG00000238083.3	3.04836	0.00230092	0.54774	371	371	371	ovary	Endometrioide
17q21.31	LRRC37A2	ENSG00000238083.3	2.61876	0.00882497	0.791325	293	293	293	cross-tissue	Invasive mucinouse
17q21.31	LRRC37A2	ENSG00000238083.3	1.5492	0.121333	0.791325	293	293	293	cross-tissue	Invasive/borderline mucinouse
17q21.31	LRRC37A2	ENSG00000238083.3	-0.945541	0.344383	0.54774	371	371	371	ovary	Mucinous: borderlinee
17q21.31	LRRC37A2	ENSG00000238083.3	7.10914	1.16766e-12	0.54774	371	371	371	ovary	All: invasivee
17q21.31	LRRC37A2	ENSG00000238083.3	-0.881183	0.378219	0.791325	293	293	293	cross-tissue	Serous: low-grade + borderlinee
17q21.31	LRRC37A2	ENSG00000238083.3	6.51257	7.38776e-11	0.54774	371	371	371	ovary	Serous: invasivee
17q21.31	LRRC37A2	ENSG00000238083.3	6.72179	1.79503e-11	0.54774	371	371	371	ovary	Serous: high-gradee
17q21.31	LRRC37A2	ENSG00000238083.3	-1.34918	0.17728	0.791325	293	293	293	cross-tissue	Serous: borderlinee
17q21.31	LRRC37A2	ENSG00000238083.3	0.615728	0.538074	0.54774	371	371	371	ovary	Serous: low-gradee
17q21.31	NSF	ENSG00000073969.14	-5.37514	7.65241e-08	0.0205385	23	23	23	ovary	Combined alld
17q21.31	NSF	ENSG00000073969.14	-5.55446	2.78467e-08	0.0205385	23	23	23	ovary	Serous: high-graded
17q21.31	NSF	ENSG00000073969.14	-0.969513	0.332289	0.0205385	23	23	23	ovary	Clear celle
17q21.31	NSF	ENSG00000073969.14	-2.18055	0.0292167	0.0205385	23	23	23	ovary	Endometrioide
17q21.31	NSF	ENSG00000073969.14	-1.26822	0.204719	0.0262124	7	7	7	cross-tissue	Invasive mucinouse
17q21.31	NSF	ENSG00000073969.14	0.496032	0.619872	0.0205385	23	23	23	ovary	Invasive/borderline mucinouse
17q21.31	NSF	ENSG00000073969.14	1.8157	0.0694159	0.0205385	23	23	23	ovary	Mucinous: borderlinee
17q21.31	NSF	ENSG00000073969.14	-3.68674	0.000227146	0.0205385	23	23	23	ovary	All: invasivee
17q21.31	NSF	ENSG00000073969.14	2.03405	0.0419469	0.0205385	23	23	23	ovary	Serous: low-grade + borderlinee
17q21.31	NSF	ENSG00000073969.14	-3.73659	0.000186531	0.0205385	23	23	23	ovary	Serous: invasivee
17q21.31	NSF	ENSG00000073969.14	-4.0051	6.19918e-05	0.0205385	23	23	23	ovary	Serous: high-gradee
17q21.31	NSF	ENSG00000073969.14	2.44695	0.0144069	0.0205385	23	23	23	ovary	Serous: borderlinee
17q21.31	NSF	ENSG00000073969.14	0.391402	0.6955	0.0205385	23	23	23	ovary	Serous: low-gradee
17q21.31	WNT3	ENSG00000108379.5	7.32529	2.38386e-13	0.395277	14	14	14	cross-tissue	Combined alld
17q21.31	WNT3	ENSG00000108379.5	6.8091	9.82091e-12	0.395277	14	14	14	cross-tissue	Serous: high-graded
17q21.31	WNT3	ENSG00000108379.5	0.996573	0.318972	0.395277	14	14	14	cross-tissue	Clear celle
17q21.31	WNT3	ENSG00000108379.5	2.12142	0.0338864	0.395277	14	14	14	cross-tissue	Endometrioide
17q21.31	WNT3	ENSG00000108379.5	1.91926	0.054952	0.395277	14	14	14	cross-tissue	Invasive mucinouse
17q21.31	WNT3	ENSG00000108379.5	0.921646	0.356713	0.395277	14	14	14	cross-tissue	Invasive/borderline mucinouse
17q21.31	WNT3	ENSG00000108379.5	-0.798305	0.424694	0.395277	14	14	14	cross-tissue	Mucinous: borderlinee
17q21.31	WNT3	ENSG00000108379.5	5.89551	3.73518e-09	0.395277	14	14	14	cross-tissue	All: invasivee
17q21.31	WNT3	ENSG00000108379.5	-1.20947	0.226481	0.395277	14	14	14	cross-tissue	Serous: low-grade + borderlinee
17q21.31	WNT3	ENSG00000108379.5	5.21748	1.81e-07	0.395277	14	14	14	cross-tissue	Serous: invasivee
17q21.31	WNT3	ENSG00000108379.5	5.60957	2.0283e-08	0.395277	14	14	14	cross-tissue	Serous: high-gradee
17q21.31	WNT3	ENSG00000108379.5	-1.22011	0.222423	0.395277	14	14	14	cross-tissue	Serous: borderlinee
17q21.31	WNT3	ENSG00000108379.5	-0.3459	0.729418	0.395277	14	14	14	cross-tissue	Serous: low-gradee
17q21.32	RP11-138C9.1	ENSG00000264558.1	5.56967	2.55216e-08	0.0172958	28	28	28	cross-tissue	Combined alld
17q21.32	RP11-138C9.1	ENSG00000264558.1	5.5393	3.03688e-08	0.0172958	28	28	28	cross-tissue	Serous: high-graded
17q21.32	RP11-138C9.1	ENSG00000264558.1	2.04686	0.0406718	0.0172958	28	28	28	cross-tissue	Clear celle
17q21.32	RP11-138C9.1	ENSG00000264558.1	2.97214	0.0029573	0.0172958	28	28	28	cross-tissue	Endometrioide
17q21.32	RP11-138C9.1	ENSG00000264558.1	0.280982	0.778724	0.0172958	28	28	28	cross-tissue	Invasive mucinouse
17q21.32	RP11-138C9.1	ENSG00000264558.1	1.28306	0.19947	0.0172958	28	28	28	cross-tissue	Invasive/borderline mucinouse
17q21.32	RP11-138C9.1	ENSG00000264558.1	1.6397	0.101068	0.0172958	28	28	28	cross-tissue	Mucinous: borderlinee
17q21.32	RP11-138C9.1	ENSG00000264558.1	5.65266	1.57988e-08	0.0172958	28	28	28	cross-tissue	All: invasivee
17q21.32	RP11-138C9.1	ENSG00000264558.1	5.4474	5.11115e-08	0.0172958	28	28	28	cross-tissue	Serous: low-grade + borderlinee
17q21.32	RP11-138C9.1	ENSG00000264558.1	5.73736	9.62e-09	0.0172958	28	28	28	cross-tissue	Serous: invasivee
17q21.32	RP11-138C9.1	ENSG00000264558.1	5.20228	1.96861e-07	0.0172958	28	28	28	cross-tissue	Serous: high-gradee
17q21.32	RP11-138C9.1	ENSG00000264558.1	4.27212	1.93621e-05	0.0172958	28	28	28	cross-tissue	Serous: borderlinee
17q21.32	RP11-138C9.1	ENSG00000264558.1	3.50095	0.000463611	0.0172958	28	28	28	cross-tissue	Serous: low-gradee
17q21.32	RP11-6N17.6	ENSG00000264019.1	6.06785	1.29633e-09	0.191888	19	19	19	cross-tissue	Combined alld
17q21.32	RP11-6N17.6	ENSG00000264019.1	5.93147	3.00226e-09	0.191888	19	19	19	cross-tissue	Serous: high-graded
17q21.32	RP11-6N17.6	ENSG00000264019.1	1.68338	0.0923017	0.191888	19	19	19	cross-tissue	Clear celle
17q21.32	RP11-6N17.6	ENSG00000264019.1	1.6399	0.101026	0.191888	19	19	19	cross-tissue	Endometrioide
17q21.32	RP11-6N17.6	ENSG00000264019.1	1.28516	0.198737	0.191888	19	19	19	cross-tissue	Invasive mucinouse
17q21.32	RP11-6N17.6	ENSG00000264019.1	0.642147	0.520778	0.191888	19	19	19	cross-tissue	Invasive/borderline mucinouse
17q21.32	RP11-6N17.6	ENSG00000264019.1	-0.316136	0.751899	0.191888	19	19	19	cross-tissue	Mucinous: borderlinee
17q21.32	RP11-6N17.6	ENSG00000264019.1	5.75226	8.8059e-09	0.191888	19	19	19	cross-tissue	All: invasivee
17q21.32	RP11-6N17.6	ENSG00000264019.1	4.06125	4.8811e-05	0.191888	19	19	19	cross-tissue	Serous: low-grade + borderlinee
17q21.32	RP11-6N17.6	ENSG00000264019.1	5.66212	1.5e-08	0.191888	19	19	19	cross-tissue	Serous: invasivee
17q21.32	RP11-6N17.6	ENSG00000264019.1	5.49296	3.95257e-08	0.191888	19	19	19	cross-tissue	Serous: high-gradee
17q21.32	RP11-6N17.6	ENSG00000264019.1	3.58578	0.000336073	0.191888	19	19	19	cross-tissue	Serous: borderlinee
17q21.32	RP11-6N17.6	ENSG00000264019.1	2.08663	0.0369218	0.191888	19	19	19	cross-tissue	Serous: low-gradee
17q21.32	PNPO	ENSG00000108439.5	5.37408	7.69726e-08	0.298274	27	27	27	cross-tissue	Combined alld
17q21.32	PNPO	ENSG00000108439.5	5.33838	9.37813e-08	0.298274	27	27	27	cross-tissue	Serous: high-graded
17q21.32	PNPO	ENSG00000108439.5	1.33014	0.183471	0.298274	27	27	27	cross-tissue	Clear celle
17q21.32	PNPO	ENSG00000108439.5	1.69304	0.090447	0.298274	27	27	27	cross-tissue	Endometrioide
17q21.32	PNPO	ENSG00000108439.5	1.04464	0.296189	0.298274	27	27	27	cross-tissue	Invasive mucinouse
17q21.32	PNPO	ENSG00000108439.5	0.554389	0.579312	0.298274	27	27	27	cross-tissue	Invasive/borderline mucinouse
17q21.32	PNPO	ENSG00000108439.5	-0.216267	0.82878	0.298274	27	27	27	cross-tissue	Mucinous: borderlinee
17q21.32	PNPO	ENSG00000108439.5	5.32743	9.96144e-08	0.298274	27	27	27	cross-tissue	All: invasivee
17q21.32	PNPO	ENSG00000108439.5	4.10244	4.08808e-05	0.298274	27	27	27	cross-tissue	Serous: low-grade + borderlinee
17q21.32	PNPO	ENSG00000108439.5	5.38298	7.33e-08	0.298274	27	27	27	cross-tissue	Serous: invasivee
17q21.32	PNPO	ENSG00000108439.5	5.0262	5.00283e-07	0.298274	27	27	27	cross-tissue	Serous: high-gradee
17q21.32	PNPO	ENSG00000108439.5	3.14202	0.00167786	0.298274	27	27	27	cross-tissue	Serous: borderlinee
17q21.32	PNPO	ENSG00000108439.5	2.681	0.00734033	0.298274	27	27	27	cross-tissue	Serous: low-gradee
17q21.32	PRR15L	ENSG00000167183.2	-5.1197	3.06021e-07	0.0420883	12	12	12	cross-tissue	Combined alld
17q21.32	PRR15L	ENSG00000167183.2	-4.90842	9.18113e-07	0.0420883	12	12	12	cross-tissue	Serous: high-graded
17q21.32	PRR15L	ENSG00000167183.2	-1.60495	0.108504	0.0420883	12	12	12	cross-tissue	Clear celle
17q21.32	PRR15L	ENSG00000167183.2	-1.9536	0.0507484	0.0420883	12	12	12	cross-tissue	Endometrioide
17q21.32	PRR15L	ENSG00000167183.2	-1.38376	0.166433	0.0420883	12	12	12	cross-tissue	Invasive mucinouse
17q21.32	PRR15L	ENSG00000167183.2	-0.895323	0.370615	0.0420883	12	12	12	cross-tissue	Invasive/borderline mucinouse
17q21.32	PRR15L	ENSG00000167183.2	0.382758	0.701899	0.0541146	48	48	48	ovary	Mucinous: borderlinee
17q21.32	PRR15L	ENSG00000167183.2	-4.84999	1.23465e-06	0.0420883	12	12	12	cross-tissue	All: invasivee
17q21.32	PRR15L	ENSG00000167183.2	-4.05488	5.01593e-05	0.0420883	12	12	12	cross-tissue	Serous: low-grade + borderlinee
17q21.32	PRR15L	ENSG00000167183.2	-4.6621	3.13e-06	0.0420883	12	12	12	cross-tissue	Serous: invasivee
17q21.32	PRR15L	ENSG00000167183.2	-4.53922	5.64619e-06	0.0420883	12	12	12	cross-tissue	Serous: high-gradee
17q21.32	PRR15L	ENSG00000167183.2	-3.8931	9.89722e-05	0.0420883	12	12	12	cross-tissue	Serous: borderlinee
17q21.32	PRR15L	ENSG00000167183.2	-3.05312	0.00226472	0.0541146	48	48	48	ovary	Serous: low-gradee
17q21.32	HOXB2	ENSG00000173917.9	-5.26805	1.37884e-07	0.397254	26	26	26	cross-tissue	Combined alld
17q21.32	HOXB2	ENSG00000173917.9	-5.4789	4.27988e-08	0.397254	26	26	26	cross-tissue	Serous: high-graded
17q21.32	HOXB2	ENSG00000173917.9	-0.52055	0.602681	0.397254	26	26	26	cross-tissue	Clear celle
17q21.32	HOXB2	ENSG00000173917.9	-1.04217	0.297332	0.397254	26	26	26	cross-tissue	Endometrioide
17q21.32	HOXB2	ENSG00000173917.9	-0.371021	0.710622	0.397254	26	26	26	cross-tissue	Invasive mucinouse
17q21.32	HOXB2	ENSG00000173917.9	0.0437739	0.965085	0.397254	26	26	26	cross-tissue	Invasive/borderline mucinouse
17q21.32	HOXB2	ENSG00000173917.9	0.50512	0.613475	0.397254	26	26	26	cross-tissue	Mucinous: borderlinee
17q21.32	HOXB2	ENSG00000173917.9	-5.21006	1.88781e-07	0.397254	26	26	26	cross-tissue	All: invasivee
17q21.32	HOXB2	ENSG00000173917.9	-2.973	0.00294905	0.397254	26	26	26	cross-tissue	Serous: low-grade + borderlinee
17q21.32	HOXB2	ENSG00000173917.9	-5.54598	2.92e-08	0.397254	26	26	26	cross-tissue	Serous: invasivee
17q21.32	HOXB2	ENSG00000173917.9	-5.0936	3.51332e-07	0.397254	26	26	26	cross-tissue	Serous: high-gradee
17q21.32	HOXB2	ENSG00000173917.9	-1.52056	0.128371	0.397254	26	26	26	cross-tissue	Serous: borderlinee
17q21.32	HOXB2	ENSG00000173917.9	-2.96468	0.00303003	0.397254	26	26	26	cross-tissue	Serous: low-gradee
17q21.32	HOXB-AS1	ENSG00000230148.4	-5.13452	2.82872e-07	0.287669	31	31	31	cross-tissue	Combined alld
17q21.32	HOXB-AS1	ENSG00000230148.4	-5.15073	2.59474e-07	0.287669	31	31	31	cross-tissue	Serous: high-graded
17q21.32	HOXB-AS1	ENSG00000230148.4	-0.987981	0.323162	0.287669	31	31	31	cross-tissue	Clear celle
17q21.32	HOXB-AS1	ENSG00000230148.4	-1.31475	0.188594	0.287669	31	31	31	cross-tissue	Endometrioide
17q21.32	HOXB-AS1	ENSG00000230148.4	-0.61484	0.538661	0.287669	31	31	31	cross-tissue	Invasive mucinouse
17q21.32	HOXB-AS1	ENSG00000230148.4	-0.02443	0.98051	0.287669	31	31	31	cross-tissue	Invasive/borderline mucinouse
17q21.32	HOXB-AS1	ENSG00000230148.4	0.644386	0.519325	0.287669	31	31	31	cross-tissue	Mucinous: borderlinee
17q21.32	HOXB-AS1	ENSG00000230148.4	-5.07658	3.84286e-07	0.287669	31	31	31	cross-tissue	All: invasivee
17q21.32	HOXB-AS1	ENSG00000230148.4	-3.10802	0.00188345	0.287669	31	31	31	cross-tissue	Serous: low-grade + borderlinee
17q21.32	HOXB-AS1	ENSG00000230148.4	-5.18208	2.19e-07	0.287669	31	31	31	cross-tissue	Serous: invasivee
17q21.32	HOXB-AS1	ENSG00000230148.4	-4.72241	2.33068e-06	0.287669	31	31	31	cross-tissue	Serous: high-gradee
17q21.32	HOXB-AS1	ENSG00000230148.4	-1.72763	0.0840554	0.287669	31	31	31	cross-tissue	Serous: borderlinee
17q21.32	HOXB-AS1	ENSG00000230148.4	-2.90108	0.00371877	0.287669	31	31	31	cross-tissue	Serous: low-gradee
17q21.32	HOXB3	ENSG00000120093.7	-5.38828	7.11368e-08	0.115986	29	29	29	cross-tissue	Combined alld
17q21.32	HOXB3	ENSG00000120093.7	-5.58807	2.29608e-08	0.115986	29	29	29	cross-tissue	Serous: high-graded
17q21.32	HOXB3	ENSG00000120093.7	-0.823722	0.410098	0.115986	29	29	29	cross-tissue	Clear celle
17q21.32	HOXB3	ENSG00000120093.7	-0.750484	0.452963	0.115986	29	29	29	cross-tissue	Endometrioide
17q21.32	HOXB3	ENSG00000120093.7	-0.888039	0.37452	0.115986	29	29	29	cross-tissue	Invasive mucinouse
17q21.32	HOXB3	ENSG00000120093.7	-0.313637	0.753796	0.115986	29	29	29	cross-tissue	Invasive/borderline mucinouse
17q21.32	HOXB3	ENSG00000120093.7	0.543585	0.586727	0.115986	29	29	29	cross-tissue	Mucinous: borderlinee
17q21.32	HOXB3	ENSG00000120093.7	-5.23554	1.64499e-07	0.115986	29	29	29	cross-tissue	All: invasivee
17q21.32	HOXB3	ENSG00000120093.7	-3.84097	0.00012255	0.115986	29	29	29	cross-tissue	Serous: low-grade + borderlinee
17q21.32	HOXB3	ENSG00000120093.7	-5.54717	2.9e-08	0.115986	29	29	29	cross-tissue	Serous: invasivee
17q21.32	HOXB3	ENSG00000120093.7	-4.9699	6.69861e-07	0.115986	29	29	29	cross-tissue	Serous: high-gradee
17q21.32	HOXB3	ENSG00000120093.7	-2.36627	0.0179686	0.115986	29	29	29	cross-tissue	Serous: borderlinee
17q21.32	HOXB3	ENSG00000120093.7	-3.31271	0.000923983	0.115986	29	29	29	cross-tissue	Serous: low-gradee
18q11.2	RP11-403A21.1	ENSG00000265752.2	-1.79314	0.0729508	0.106675	14	14	14	cross-tissue	Combined alld
18q11.2	RP11-403A21.1	ENSG00000265752.2	-2.42775	0.0151928	0.106675	14	14	14	cross-tissue	Serous: high-graded
18q11.2	RP11-403A21.1	ENSG00000265752.2	-0.908148	0.3638	0.0429123	1	1	1	ovary	Clear celle
18q11.2	RP11-403A21.1	ENSG00000265752.2	0.466548	0.640823	0.106675	14	14	14	cross-tissue	Endometrioide
18q11.2	RP11-403A21.1	ENSG00000265752.2	1.65759	0.0974009	0.106675	14	14	14	cross-tissue	Invasive mucinouse
18q11.2	RP11-403A21.1	ENSG00000265752.2	0.948948	0.342647	0.106675	14	14	14	cross-tissue	Invasive/borderline mucinouse
18q11.2	RP11-403A21.1	ENSG00000265752.2	0.550757	0.5818	0.0429123	1	1	1	ovary	Mucinous: borderlinee
18q11.2	RP11-403A21.1	ENSG00000265752.2	-1.32874	0.183933	0.106675	14	14	14	cross-tissue	All: invasivee
18q11.2	RP11-403A21.1	ENSG00000265752.2	-5.53419	3.1267e-08	0.106675	14	14	14	cross-tissue	Serous: low-grade + borderlinee
18q11.2	RP11-403A21.1	ENSG00000265752.2	-2.03455	0.0418964	0.106675	14	14	14	cross-tissue	Serous: invasivee
18q11.2	RP11-403A21.1	ENSG00000265752.2	1.86309	0.06245	0.0429123	1	1	1	ovary	Serous: high-gradee
18q11.2	RP11-403A21.1	ENSG00000265752.2	-4.12931	3.63851e-05	0.106675	14	14	14	cross-tissue	Serous: borderlinee
18q11.2	RP11-403A21.1	ENSG00000265752.2	-3.92938	8.51663e-05	0.106675	14	14	14	cross-tissue	Serous: low-gradee
19p13.11	ABHD8	ENSG00000127220.5	3.89409	9.85665e-05	0.22635	33	33	33	cross-tissue	Combined alld
19p13.11	ABHD8	ENSG00000127220.5	4.78735	1.69002e-06	0.22635	33	33	33	cross-tissue	Serous: high-graded
19p13.11	ABHD8	ENSG00000127220.5	-0.740238	0.459156	0.0776018	71	71	71	ovary	Clear celle
19p13.11	ABHD8	ENSG00000127220.5	-0.501322	0.616145	0.22635	33	33	33	cross-tissue	Endometrioide
19p13.11	ABHD8	ENSG00000127220.5	-0.851231	0.394641	0.22635	33	33	33	cross-tissue	Invasive mucinouse
19p13.11	ABHD8	ENSG00000127220.5	0.713618	0.475463	0.0776018	71	71	71	ovary	Invasive/borderline mucinouse
19p13.11	ABHD8	ENSG00000127220.5	0.929511	0.352624	0.0776018	71	71	71	ovary	Mucinous: borderlinee
19p13.11	ABHD8	ENSG00000127220.5	4.49169	7.06596e-06	0.22635	33	33	33	cross-tissue	All: invasivee
19p13.11	ABHD8	ENSG00000127220.5	-1.95019	0.0511536	0.0776018	71	71	71	ovary	Serous: low-grade + borderlinee
19p13.11	ABHD8	ENSG00000127220.5	5.71196	1.12e-08	0.22635	33	33	33	cross-tissue	Serous: invasivee
19p13.11	ABHD8	ENSG00000127220.5	5.66001	1.51363e-08	0.22635	33	33	33	cross-tissue	Serous: high-gradee
19p13.11	ABHD8	ENSG00000127220.5	-1.42784	0.153337	0.0776018	71	71	71	ovary	Serous: borderlinee
19p13.11	ABHD8	ENSG00000127220.5	-1.61089	0.107204	0.0776018	71	71	71	ovary	Serous: low-gradee
19q13.2	ZNF546	ENSG00000187187.9	-0.871031	0.383737	0.013699	22	22	22	ovary	Combined alld
19q13.2	ZNF546	ENSG00000187187.9	-1.68081	0.0928005	0.013699	22	22	22	ovary	Serous: high-graded
19q13.2	ZNF546	ENSG00000187187.9	0.415215	0.677984	0.013699	22	22	22	ovary	Clear celle
19q13.2	ZNF546	ENSG00000187187.9	-0.838491	0.401755	0.013699	22	22	22	ovary	Endometrioide
19q13.2	ZNF546	ENSG00000187187.9	4.48515	7.28628e-06	0.013699	22	22	22	ovary	Invasive mucinouse
19q13.2	ZNF546	ENSG00000187187.9	7.144	9.06553e-13	0.013699	22	22	22	ovary	Invasive/borderline mucinouse
19q13.2	ZNF546	ENSG00000187187.9	5.98665	2.14207e-09	0.013699	22	22	22	ovary	Mucinous: borderlinee
19q13.2	ZNF546	ENSG00000187187.9	-0.675857	0.499131	0.013699	22	22	22	ovary	All: invasivee
19q13.2	ZNF546	ENSG00000187187.9	0.629908	0.528755	0.013699	22	22	22	ovary	Serous: low-grade + borderlinee
19q13.2	ZNF546	ENSG00000187187.9	-1.61307	0.106728	0.013699	22	22	22	ovary	Serous: invasivee
19q13.2	ZNF546	ENSG00000187187.9	-1.57008	0.116396	0.013699	22	22	22	ovary	Serous: high-gradee
19q13.2	ZNF546	ENSG00000187187.9	1.13033	0.258338	0.013699	22	22	22	ovary	Serous: borderlinee
19q13.2	ZNF546	ENSG00000187187.9	-0.41214	0.680237	0.013699	22	22	22	ovary	Serous: low-gradee
a P values < 2.21 × 10-6 were in bold.
b r2 of tissue model's correlation to gene's measured transcriptome (prediction performance)
c N: number of snps from GWAS that were used in MetaXcan analysis; covariance_N: number of snps in the covariance matrix; model_N: number of snps in the model.
d The analyses were based on invasive-combined or high-grade serous summary statistics from Ovarian Cancer Association Consortium (OCAC) and Consortium of Investigators of Modifiers of BRCA1/2 (CIMBA);
e The analyses were based on summary statistics from OCAC.
